# Supplementary material
Source: Springer Nature journal article supplement (https://www.springermedizin.de/resource/supplementary/12985_2009_539_MOESM1_ESM.pdf/9608406)

**A.**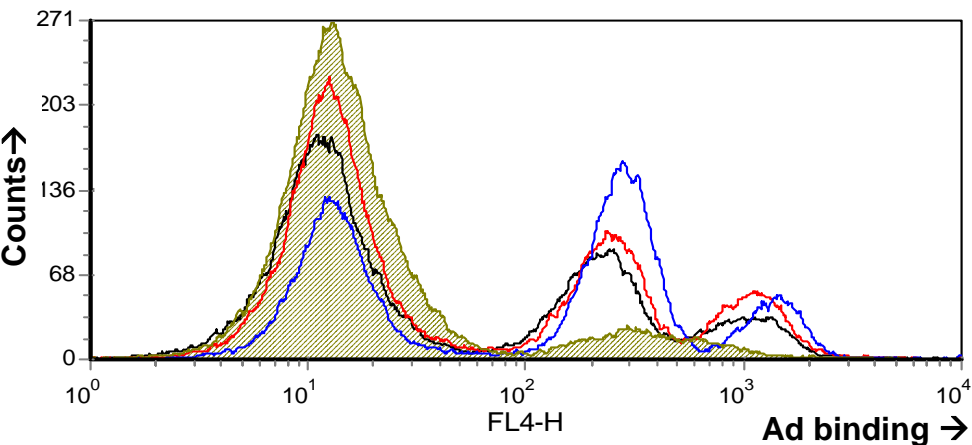

— MO, — MO- $\alpha$ V $\beta$ 3, — MO-IIb $\beta$ 3, ▨ w/o Ad

**B.**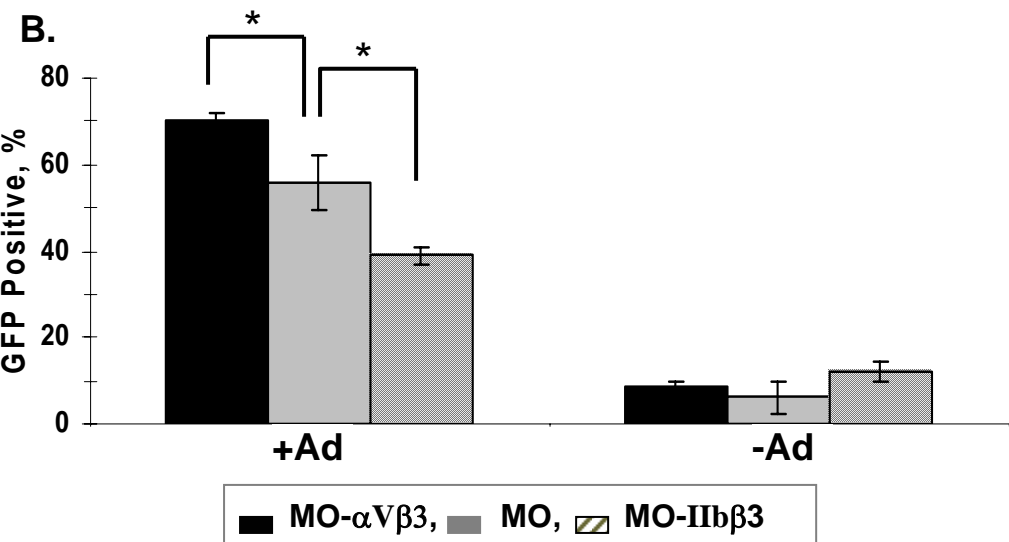

Supplement: MOESM1 [file 9608406]
